# Supplementary material
Source: MDPI journal article supplement (https://www.mdpi.com/2673-6497/3/1/8)
Supplement: s1 [file s1]

## Supporting Information

# **Temperature-Dependent Raman Studies of FAPbBr<sub>3</sub> and MAPbBr<sub>3</sub> Perovskites: Effect of Phase Transitions on Molecular Dynamics and Lattice Distortion**

Mirosław Mączka \* and Maciej Ptak

Institute of Low Temperature and Structure Research, Polish Academy of Sciences, Okólna 2, 50-422 Wrocław, Poland; [m.ptak@intibs.pl](mailto:m.ptak@intibs.pl)

\* Correspondence: [m.maczka@intibs.pl](mailto:m.maczka@intibs.pl)



**Table S1.** Raman wavenumbers (in cm<sup>-1</sup>) of MAPbBr<sub>3</sub> together with the proposed assignment.<sup>a</sup>

| 300 K<br>( <i>Pm</i> $\bar{3}$ <i>m</i> ) | 156 K<br>( <i>I4/mcm</i> ) | 150 K<br>( <i>P4/mmm</i> or <i>Imma</i> ) | 90 K<br>( <i>Pnma</i> ) | Assignment                                             |
|-------------------------------------------|----------------------------|-------------------------------------------|-------------------------|--------------------------------------------------------|
| 1588w                                     | 1593w                      | 1593w                                     | 1594m                   | $\delta_{as}(\text{NH}_3)$                             |
| 1482m                                     | 1483m                      | 1483m                                     | 1475s                   | $\delta_s(\text{NH}_3)$                                |
| 1455sh                                    | 1458w                      | 1459w                                     | 1463m + 1459sh          | $\delta_{as}(\text{CH}_3)$                             |
| 1430vw                                    | 1426w                      | 1426w                                     | 1424w                   | $\delta_s(\text{CH}_3)$                                |
| 1250vw                                    | 1256w                      | 1257m                                     | 1262w                   | $\delta(\text{CN})$                                    |
| 971m                                      | 974m                       | 976m                                      | 973s                    | $\nu(\text{CN})$                                       |
| 918w                                      | 919m                       | 918m                                      | 917s                    | $\rho(\text{NH}_3)+\rho(\text{CH}_3)$                  |
|                                           |                            |                                           | 551w                    | overtone                                               |
| 322m                                      | 322m                       | 322m                                      | 363sh + 324m            | MA-cage mode                                           |
| 138m                                      | 138m                       | 139m                                      | 141m                    | T'(MA <sup>+</sup> )+L(MA <sup>+</sup> )+Pb-Br stretch |
| 124m                                      | 126m                       | 126m                                      | 127m                    | T'(MA <sup>+</sup> )+L(MA <sup>+</sup> )+Pb-Br stretch |
| 111m                                      | 111m                       | 112m                                      | 111m                    | T'(MA <sup>+</sup> )+L(MA <sup>+</sup> )+Pb-Br stretch |
|                                           |                            |                                           | 98m                     | T'(MA <sup>+</sup> )+L(MA <sup>+</sup> )+Pb-Br stretch |
|                                           |                            |                                           | 90m                     | T'(MA <sup>+</sup> )+L(MA <sup>+</sup> )+Pb-Br stretch |
| 80m                                       | 81m                        | 81m                                       | 81s                     | T'(MA <sup>+</sup> )+L(MA <sup>+</sup> )+Pb-Br stretch |
|                                           |                            |                                           | 68vs                    | octahedra distortion (Pb-Br bend)                      |
|                                           |                            |                                           | 63s                     | octahedra distortion (Pb-Br bend)                      |
| 58s                                       | 58vs                       | 58vs                                      | 54s                     | octahedra distortion (Pb-Br bend)                      |
|                                           |                            | 47s                                       | 44s                     | octahedra twist (L(PbBr <sub>6</sub> ))                |
|                                           |                            | 38s                                       | 35vs                    | octahedra twist (L(PbBr <sub>6</sub> ))                |

<sup>a</sup> key: vs, very strong; s, strong; m, medium; w, weak; vw, very weak; sh, shoulder;  $\nu$ , stretching;  $\delta$ , bending;  $\rho$ , rocking; L, librational mode; T', translational mode



**Table S2.** Raman wavenumbers (in cm<sup>-1</sup>) of FAPbBr<sub>3</sub> together with the proposed assignment.<sup>a</sup>

| 300 K  | 200 K  | 170 K       | 150 K       | 120 K         | 100 K         | Assignment                                             |
|--------|--------|-------------|-------------|---------------|---------------|--------------------------------------------------------|
| 1725vw | 1724vw | 1723vw      | 1722vw      | 1722vw        | 1721vw        | $\delta(\text{NH}_2) + \nu_{\text{as}}(\text{CN})$     |
| 1653sh | 1652sh | 1652sh      | 1651sh      | 1649sh        | 1650sh        | $\delta(\text{NH}_2)$                                  |
| 1625w  | 1624w  | 1623w       | 1623w       | 1622w         | 1622w         | $\delta(\text{NH}_2)$                                  |
| 1562w  | 1560w  | 1559w       | 1558w       | 1558w         | 1558w         | $\delta(\text{NH}_2)$                                  |
| 1530sh | 1534sh | 1535vw      | 1534vw      | 1533vw        | 1532vw        | $\delta(\text{NH}_2)$                                  |
|        | 1437w  | 1439w       | 1439w       | 1448w + 1428w | 1444w + 1432w | $\delta(\text{CH})$                                    |
| 1395sh | 1392m  | 1391m       | 1390m       | 1389m         | 1388m         | $\delta(\text{CH})$                                    |
| 1369sh | 1360w  | 1360w       | 1359w       | 1359w         | 1359w         | $\rho(\text{NH}_2)$                                    |
| 1122m  | 1122m  | 1124m       | 1128w       | 1128w         | 1128w         | $\rho(\text{NH}_2)$                                    |
| 1104w  | 1099w  | 1101m       | 1102m       | 1102m         | 1102m         | $\nu(\text{CN}) + \rho(\text{NH}_2)$                   |
| 861w   | 862w   | 865w        | 868w        | 870w          | 873w          | overtone                                               |
| 719w   | 719w   | 759w + 721w | 757w + 719w | 758w + 719w   | 761w + 720w   | $\omega(\text{NH}_2)$                                  |
| 602w   | 600w   | 598w        | 602w        | 602w          | 602m          | $\tau(\text{NH}_2)$                                    |
| 521m   | 519m   | 519m        | 518s        | 518s          | 518s          | $\delta(\text{NCN})$                                   |
| 307m   | 307m   | 307m        | 307m        | 307m          | 307m          | FA-cage mode                                           |
| 109m   | 111m   | 111m        | 113m        | 115m          | 115m          | T'(MA <sup>+</sup> )+L(MA <sup>+</sup> )+Pb-Br stretch |
| 76w    | 72w    | 71w         | 69w         | 73w           | 74w           | octahedra distortion (Pb-Br bend)                      |
|        |        |             |             |               | 64w           | octahedra distortion (Pb-Br bend)                      |
|        |        |             | 48sh        | 53sh          | 52sh          | octahedra distortion (Pb-Br bend)                      |
|        |        |             |             | 40sh          | 39sh          | octahedra distortion (Pb-Br bend)                      |
| 29vs   | 31vs   | 32vs        | 33vs        | 33vs          | 33vs          | octahedra twist (L(PbBr <sub>6</sub> ))                |

<sup>a</sup> key: vs, very strong; s, strong; m, medium; w, weak; vw, very weak; sh, shoulder;  $\nu$ , stretching;  $\delta$ , bending;  $\rho$ , rocking;  $\omega$ , wagging;  $\tau$ , twist; L, librational mode; T', translational mode
